# Supplementary material for: Solid phase microextraction–comprehensive two-dimensional gas chromatography–time-of-flight mass spectrometry: a new tool for determining PAHs in airport runoff water samples
Source: Royal Society of Chemistry journal article supplement (doi:10.1039/c6ay00401f), 2016-01-01
Supplement: c6ay00401f1.pdf [file c6ay00401f1.pdf]

### ESI Figure Captions

**Fig. S1** 2D total ion chromatogram of the model sample of airport runoff water spiked with a standard mixture of 16 PAHs for the optimized HS-SPME conditions.

**Fig. S2** 2D total ion chromatogram of airport runoff water sample collected on 14 Jan 2013 from the river outflow at the International Large Airport PL.
