# Supplementary figures and images for: Solid phase microextraction–comprehensive two-dimensional gas chromatography–time-of-flight mass spectrometry: a new tool for determining PAHs in airport runoff water samples
Source: Royal Society of Chemistry journal article supplement (doi:10.1039/c6ay00401f), 2016-01-01

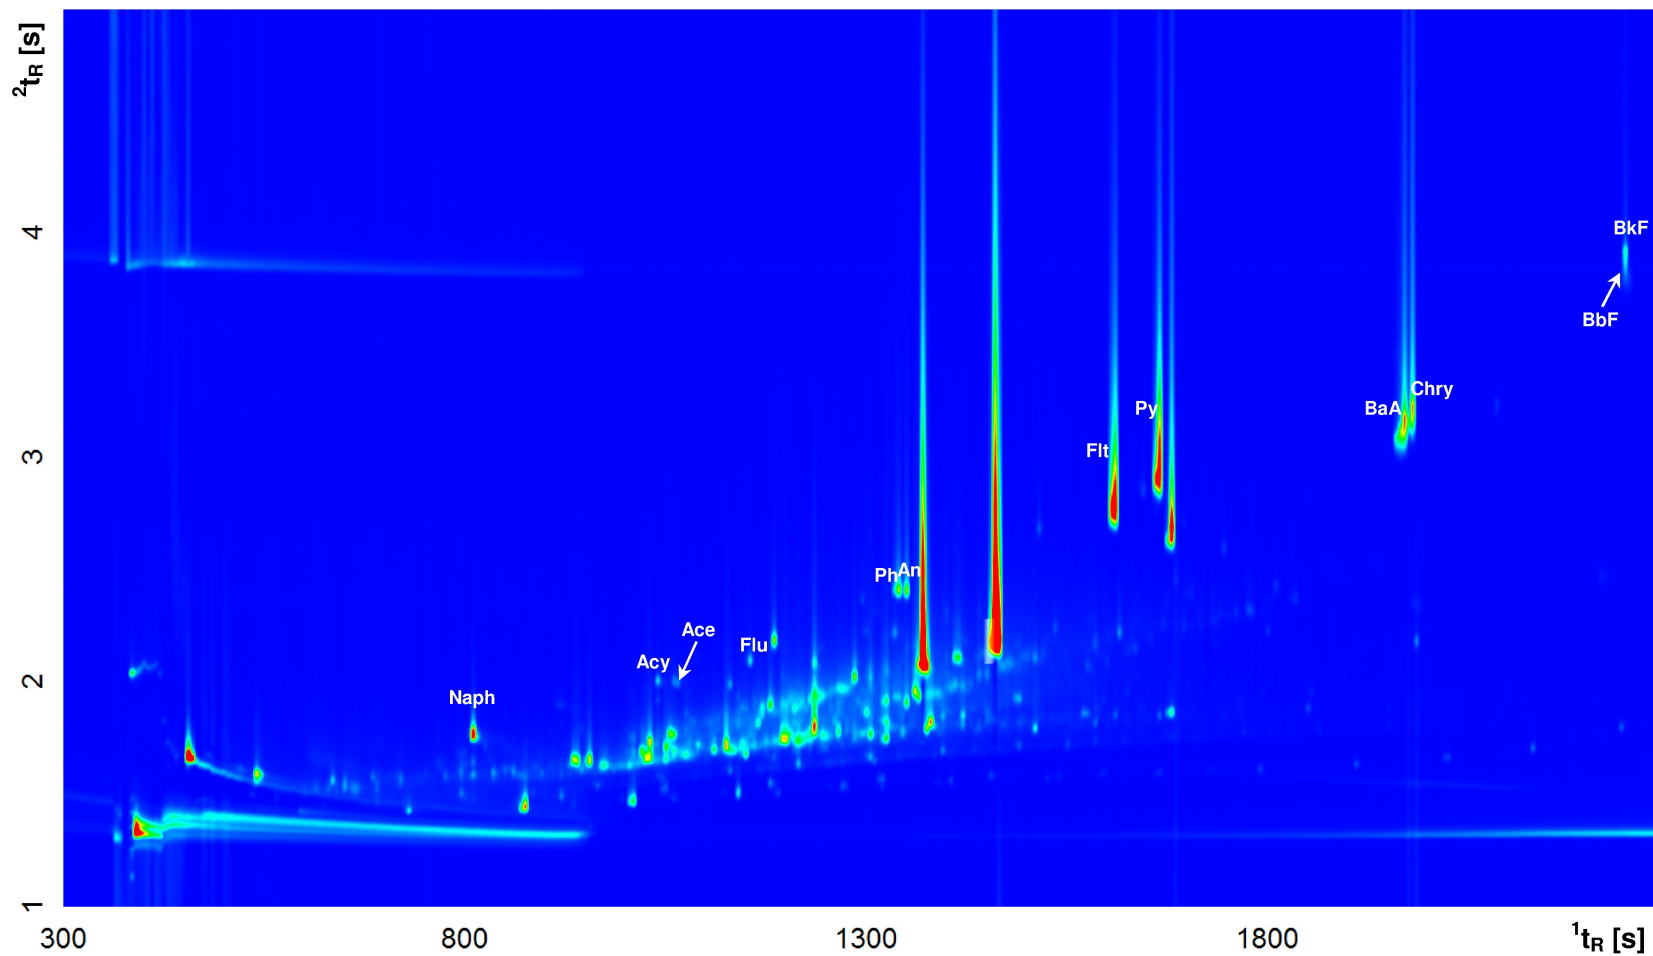

Supplement: c6ay00401f3.pdf [file c6ay00401f3.pdf]
